# Supplementary material
Source: publisher site journal article supplement (https://www.dovepress.com/article/602643)
Supplement: Supplementary file 1 [file 602643%20Revised%20Supplementary%20Materials.docx]

Supplementary Material

# Supplemental material and methods

**Baseline examination**

Anthropometric measurements were taken by trained nurses. Data for height and weight were 3 acquired following a protocol standardized to an accuracy of 0.1 kg and 0.1 cm, respectively. Current smokers were defined as having smoked 100 cigarettes in their lifetime and currently smoking. Alcohol consumption was evaluated with questions rgarding the types of alcoholic beverages, the frequency of alcohol consumption per week, and the usual amount consumed per occasion. Subjects who reported alcohol consumption >140 g/week for men and >70 g/week for women were deemed to have excessive alcohol consumption. Blood pressure was measured using a electronic sphygmomanometer after the patient had rested quietly for at least 10 minutes, and the average of multiple measurements was taken as the systolic and diastolic blood pressure values. All biochemical tests were measured by blood sampling after an overnight fast.

For laboratory testing, blood samples were collected from all patients after fasting by professional nurses and sent to the medical institution for standardized analysis using a biochemical analyzer. The specific analyzer and methods are detailed below:

Biochemical analyzer: All blood samples were analyzed using the Beckman Coulter AU5800 fully automated biochemical analyzer.

Assay methods:

Serum uric acid (SUA): Uricase-peroxidase method;

Fasting blood glucose (FBG): Hexokinase method;

Lipid profiles (total cholesterol, triglycerides, HDL-C, LDL-C): Enzymatic colorimetric method;

C-reactive protein (CRP): Immunoturbidimetric method.

**Definitions**

Criteria for hypertension included self-reported hypertension, current use of anti-hypertensive medication, or systolic blood pressure (SBP) ≥ 140 mmHg and/or diastolic blood pressure (DBP) ≥ 90 mmHg recorded for at least three consecutive readings. Hyperlipidemia is defined as an abnormal elevation of lipid levels in the bloodstream, primarily characterized by increased concentrations of total cholesterol (TC), low-density lipoprotein cholesterol (LDL-C), and triglycerides (TG), or a reduction in high-density lipoprotein cholesterol (HDL-C). According to international guidelines, hyperlipidemia is diagnosed when TC levels exceed 6.2 mmol/L (240 mg/dL), LDL-C levels are ≥ 4.1 mmol/L (160 mg/dL), TG levels are ≥ 2.3 mmol/L (200 mg/dL), or HDL-C levels fall below 1.0 mmol/L (40 mg/dL) in men and 1.3 mmol/L (50 mg/dL) in women. Coronary heart disease (CHD) was diagnosed primarily based on coronary angiography findings, with luminal stenosis ≥50% in the left main or major coronary branches confirming the diagnosis. Additionally, patients with a history of fatal or non‑fatal myocardial infarction, unstable angina, or prior coronary revascularization procedures (e.g., percutaneous coronary intervention or coronary artery bypass grafting) were also classified as having CHD

**Details of the statistical analyses**.

Regarding missing data, we acknowledge that some covariates had missing values. To address this, we used multiple imputation with the Mice package in R. All covariates had a missing proportion of less than 20%. Five imputed datasets were generated, and the results were pooled to ensure that the imputed data preserved the original distribution and characteristics.

Variables of baseline characteristics are shown as n (%) if categorical, mean (SD) if normally distributed, and median (interquartile range) if nonnormally distributed. To compare the characteristics among different serum uric acid (SUA) groups, the chi-square test was performed for categorical variables, and one-way analysis of variance, or the Kruskal-Wallis test, was performed for continuous variables with normal and skewed distributions.

The association between SUA and the new-onset diabetes risk in patients with CHD was tested using a multivariate Cox regression model. This study set four different models (Model 1: unadjusted; Model 2: age, sex, BMI, smoking status and drinking status were adjusted; Model 3:Model 2 plus adjustment for SBP, DBP, ALT,AST, TC, TG, HDL-C, and LDL-C. Model 4: Model 3 plus adjustment for Hyperlipidemia and Hypertension. Model 5: Model 4 plus adjustment for use of antiplatelet drugs, Lipid-lowering drugs, diuretics, beta-blockers, and ACEIs/ARBs.) to adjust for covariates considering that the condition of over-adjustment might exist when a large number of factors are adjusted for simultaneously. Tests for trend were conducted, assigning the median value within each tertile to the corresponding tertile.

Furthermore, a generalized additive model was applied to examine the dose-response relationship between serum uric acid and new-onset diabetes, followed by a two-piecewise regression based on the threshold suggested by the model. To investigate potential sex differences, the analysis was repeated after stratifying by sex, again using the generalized additive model and threshold-based piecewise regression. In addition, stratified analyses were performed according to various clinical characteristics to assess the consistency of the association across different subgroups. The specific subgroup variables included: Patient baseline characteristics: sex, age, BMI, smoking status, and alcohol consumption status; Comorbidities: hypertension and hyperlipidemia; Medication use: diuretic use.

To assess the incremental predictive ability of serum uric acid for diabetes risk, the net reclassification improvement, integrated discrimination improvement, and concordance index were calculated. Finally, mediation analysis was performed to systematically examine the potential mediating effects and proportional contributions of various inflammatory and metabolic markers in the association between uric acid and diabetes.

All statistical analyses were performed using R software, version 4.2.2, with a two-sided P-value < 0.05 considered statistically significant.

1. **Supplementary Tables**

**Table S1.** Covariance Diagnostics

| **Variable** | **VIF** |
| --- | --- |
| SUA | 1.250958 |
| Age | 1.675109 |
| Sex | 1.180624 |
| BMI | 1.40674 |
| SBP | 1.592431 |
| DBP | 1.626991 |
| Smoking | 1.685572 |
| Drinking | 1.78804 |
| ALT | 3.612546 |
| AST | 3.341569 |
| TC | 1.545035 |
| TG | 2.270947 |
| HDL-C | 1.820062 |
| LDL-C | 1.03645 |
| FPG | 1.711834 |
| Hypertension | 1.063657 |
| Hyperlipidemia | 1.042958 |
| Lipid-lowering drugs | 1.578031 |
| Antiplatelet drugs | 1.587612 |
| Diuretics | 1.175606 |
| Beta-blockers | 1.068149 |
| ACEIs/ARBs | 1.155186 |

VIF = 1/(1-R2). VIF step-by-step screening method: Calculate the VIF of each variable. If the maximum VIF value ≥5, remove the variable with the maximum VIF value.

Abbreviations: VIF, variance inflation factor.

**3 Supplementary Figures**

**
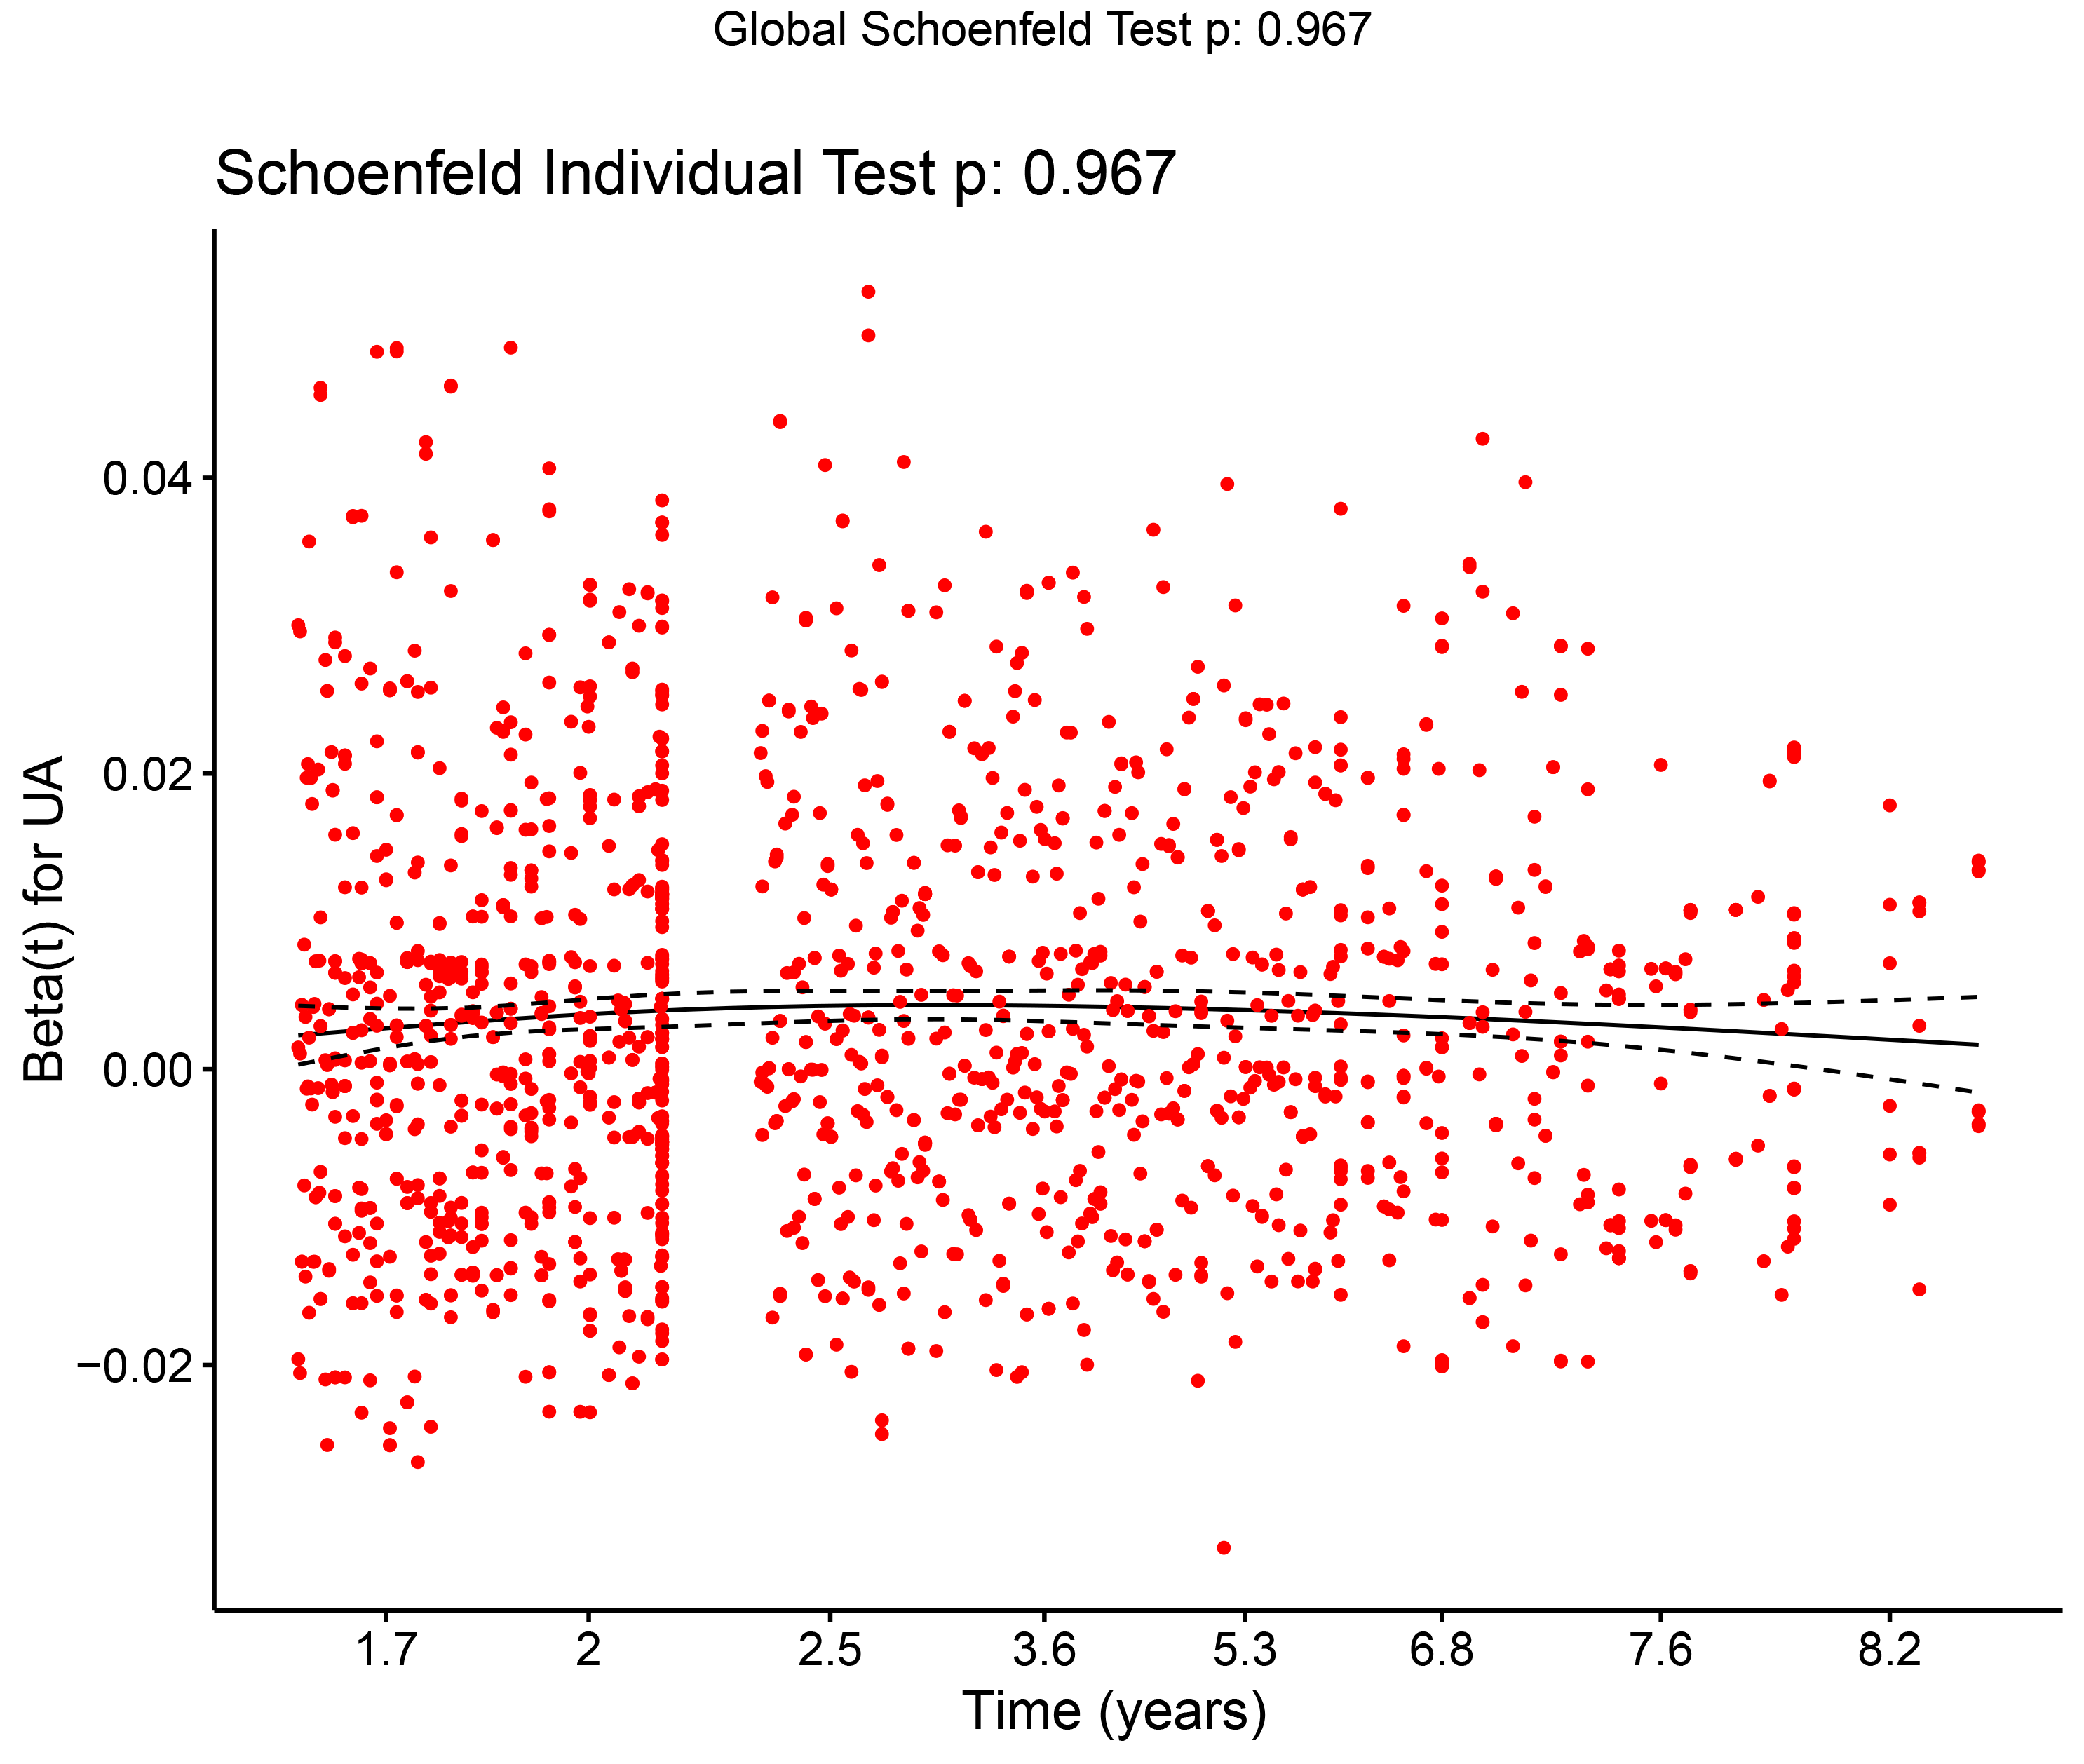
**

**Figure S1** Proportional hazards assumption assessment
